# Supplementary material for: Poly(3,4-ethylenedioxythiophene):polystyrene sulfonate (PEDOT:PSS) as an insulin carrier in silk fibroin hydrogels for transdermal delivery via iontophoresis
Source: Royal Society of Chemistry journal article supplement (doi:10.1039/d3ra06857a), 2024-01-01
Supplement: d3ra06857a1.pdf [file d3ra06857a1.pdf]

# Poly(3,4-ethylenedioxythiophene): Polystyrene Sulfonate (PEDOT:PSS) as Insulin Carrier in Silk Fibroin Hydrogel for Transdermal Delivery via Iontophoresis

## Supporting Information

Phimchanok Sakunpongpitiporn <sup>a</sup>, Rawita Morarad <sup>a</sup>, Witthawat Naeowong <sup>b</sup>, Sumonman  
Niamlang <sup>c</sup>, Anuvat Sirivat <sup>a\*</sup>

<sup>a</sup> The Conductive and Electroactive Polymers Research Unit, The Petroleum and Petrochemical  
College, Chulalongkorn University, Bangkok, 10330, Thailand

<sup>b</sup> Division of Perioperative and Ambulatory Medicine, Department of Medicine, Faculty of  
Medicine, Chulalongkorn University, Bangkok, 10330, Thailand

<sup>c</sup> Department of Materials and Metallurgical Engineering, Faculty of Engineering, Rajamangala  
University of Technology Thanyaburi, Pathumthani, 12110, Thailand

E-mail: [anuvat.s@chula.ac.th](mailto:anuvat.s@chula.ac.th)

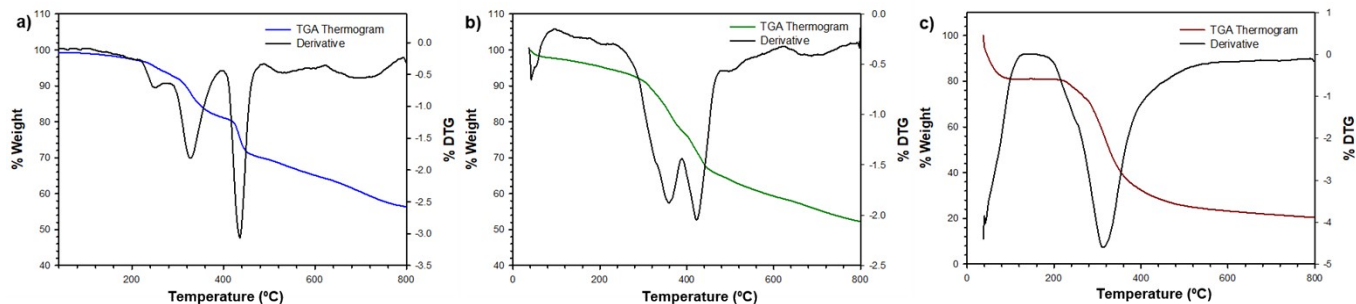

**Fig. S1** The TGA thermograms and derivatives of: a) Insulin powders; b) PEDOT: PSS; c) Insulin loaded PEDOT: PSS.

| Sample Code               | $T_d$ (°C) | % Weight loss |
|---------------------------|------------|---------------|
| Insulin powders           | 313        | 56.58%        |
| PEDOT: PSS                | 360        | 18.35%        |
|                           | 428        | 19.23%        |
| Insulin loaded PEDOT: PSS | 250        | 4.13%         |
|                           | 326        | 12.33%        |
|                           | 414        | 17.27%        |

**Table S1**  $T_d$  and % weight losses of insulin powder, PEDOT: PSS, and Insulin loaded PEDOT: PSS

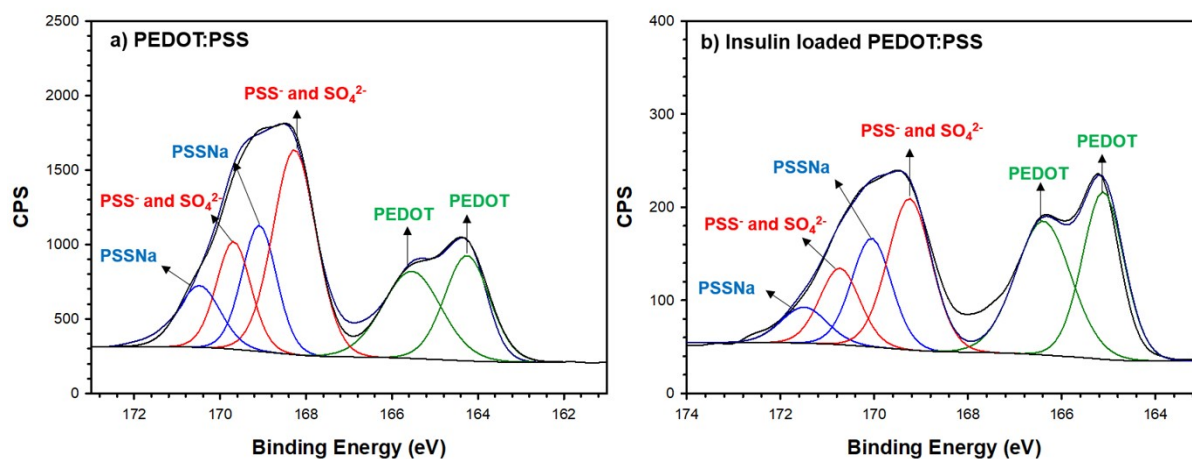

Fig. S2 High resolution XPS spectra of S 2p of: (a) PEDOT:PSS; and (b) Insulin loaded PEDOT:PSS.

Table S2 XPS deconvoluted contribution of S 2p (sulphur)

| Sample Code               | % PEDOT | % PSS <sup>-</sup> and SO <sub>4</sub> <sup>2-</sup> | % PSSNa |
|---------------------------|---------|------------------------------------------------------|---------|
| PEDOT: PSS                | 33.43   | 45.07                                                | 21.49   |
| Insulin loaded PEDOT: PSS | 47.87   | 36.45                                                | 15.68   |

**Table S3 The percentages of cell viability from the MTT cytotoxicity assay**

| <b>Sample Code</b>    | <b>OD 570 nm</b> | <b>% Cell Viability<br/>(p value &lt;0.01)</b> |
|-----------------------|------------------|------------------------------------------------|
| Blank                 | 0.447            | 100                                            |
| 3.0 %w/v SF           | 0.391            | 87                                             |
| 5.0 %w/v SF           | 0.403            | 90                                             |
| PEDOT:PSS_3.0 %w/v SF | 0.360            | 80                                             |

$$\% \text{ Cell Viability} = 100 \times \text{OD}_{570\text{e}} / \text{OD}_{570\text{b}}$$

where  $\text{OD}_{570\text{e}}$  is the mean value of the measured optical density of the 100% extracts of the test sample, and  $\text{OD}_{570\text{b}}$  is the mean value of the measured optical density of the 100% extracts of the blanks.

**Table S4 The swelling times to equilibrium, the percentages of swelling, and the mesh sizes of SF hydrogels and PEDOT:PSS/SF hydrogels of various concentrations, with and without electric**

| Conditions             | Electric Voltages (V) | pH  | Swelling time to Equilibrium (min) | % Swelling | Mesh Size (Å) |
|------------------------|-----------------------|-----|------------------------------------|------------|---------------|
| 3%w/v SF               | 0.0                   | 7.4 | 90                                 | 111 ± 16   | 13.7          |
|                        | 3.0                   | 7.4 | 85                                 | 140 ± 21   | 48.8          |
|                        | 6.0                   | 7.4 | 75                                 | 154 ± 19   | 63.8          |
| 4%w/v SF               | 0.0                   | 7.4 | 100                                | 93 ± 12    | 12.8          |
| 5%w/v SF               | 0.0                   | 7.4 | 110                                | 61 ± 13    | 12.3          |
| PEDOT:PSS_<br>3%w/v SF | 0.0                   | 5.5 | 80                                 | 652 ± 18   | 21.3          |
|                        | 0.0                   | 7.4 | 70                                 | 850 ± 26   | 26.5          |
|                        | 3.0                   | 7.4 | 50                                 | 964 ± 62   | 324.1         |
|                        | 6.0                   | 7.4 | 40                                 | 1137 ± 30  | 473.2         |
| PEDOT:PSS_<br>4%w/v SF | 0.0                   | 7.4 | 90                                 | 787 ± 53   | 21.1          |
| PEDOT:PSS_<br>5%w/v SF | 0.0                   | 7.4 | 100                                | 573 ± 76   | 19.7          |

**voltages**

Remarks: The p values of the percentage of swelling for the effects of SF concentrations (3 %, 4 %, and 5 %w/v SF), and electrical voltages (3 %w/v SF at 0.0, 3.0, 6.0 V) were < 0.01, and < 0.05, respectively.

The p values of the percentage of swelling for the effects of PEDOT:PSS/SF concentrations (PEDOT:PSS\_3 %, 4 %, and 5 %w/v SF), pHs (PEDOT:PSS\_3 %w/v SF at pHs 5.5 and 7.4), and electrical voltages (PEDOT:PSS\_3 %w/v SF at 0.0, 3.0, 6.0 V) were < 0.01, <0.01, and < 0.01, respectively.
